# Supplementary material
Source: PubMed Central journal article supplement (PMC11251034)

# Supplemental Figure 1

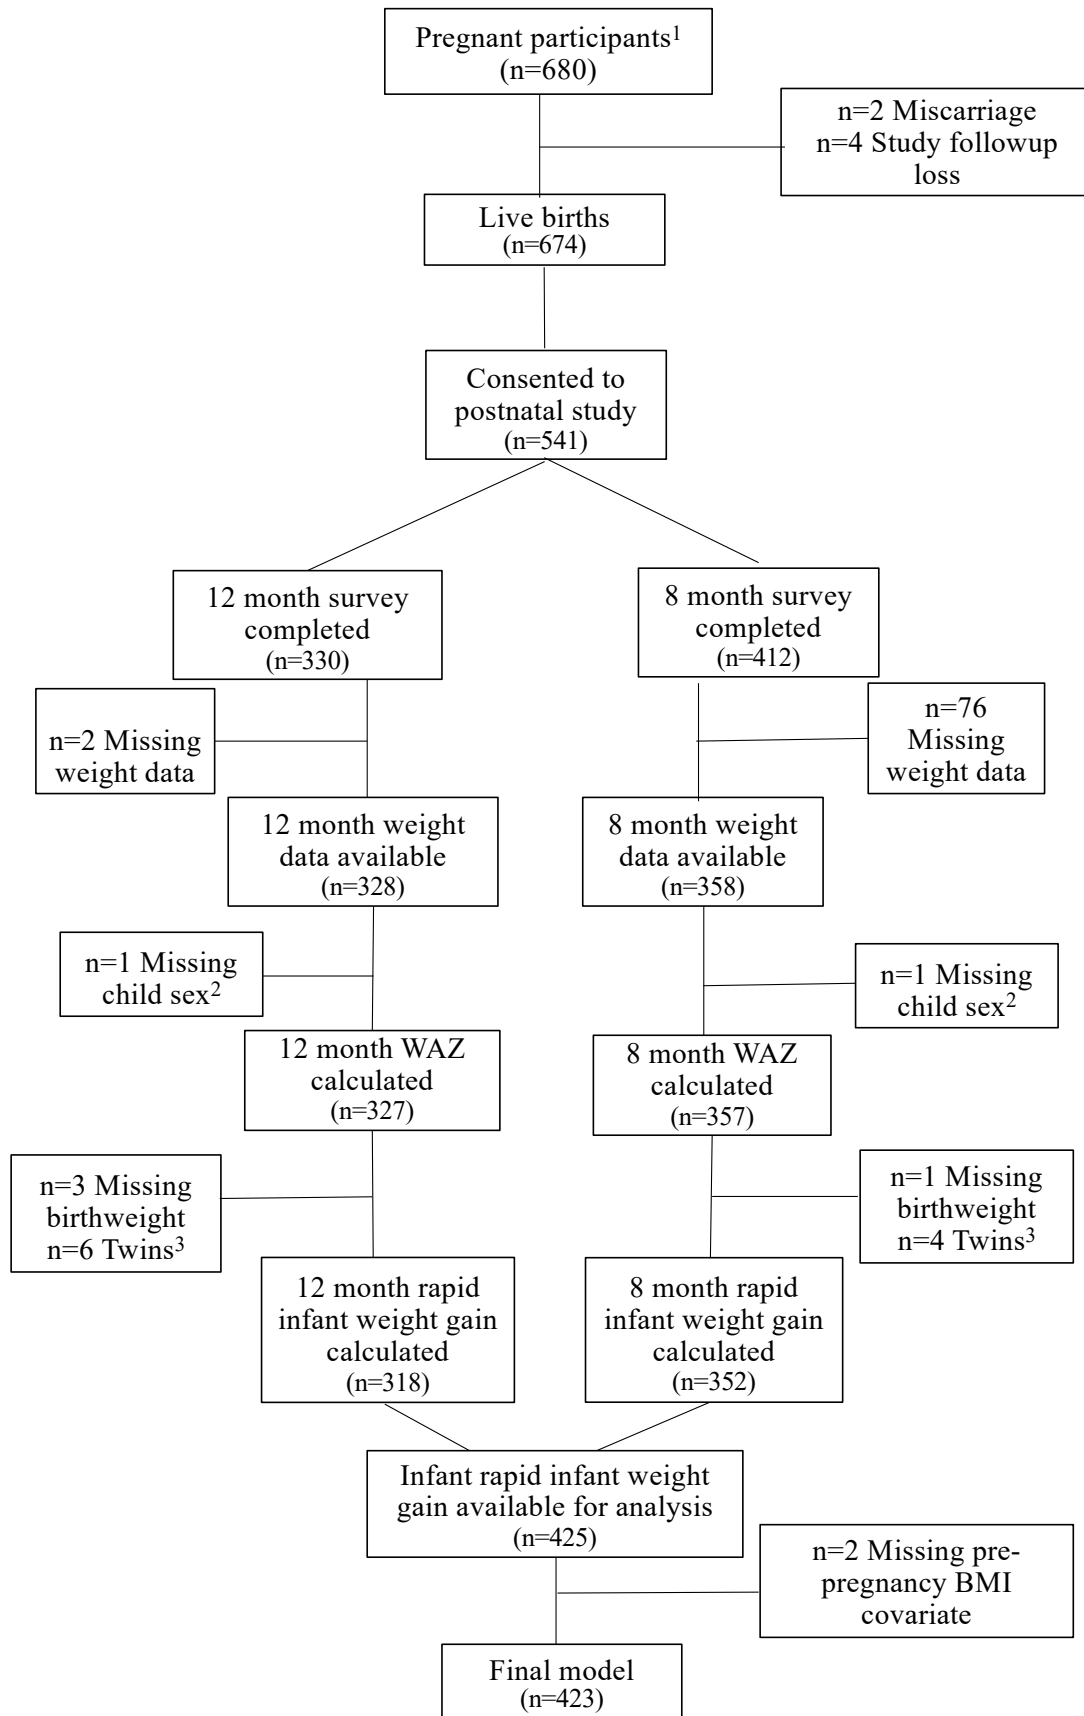

Supplement: NIHMS1999516-supplement-Supp_Fig_1.pdf [file NIHMS1999516-supplement-Supp_Fig_1.pdf]
